# Supplementary material for: Influence of Nitrogen Doping on Vacancy-Engineered T-Graphene Fragments: Insights into Electronic and Optical Properties
Source: MDPI journal article supplement (doi:10.3390/chemistry7040126), 2025-08-07
Supplement: s1 [file chemistry-3758565-supplementary.pdf › chemistry-3758565-supplementary.pdf]

## Supporting Information

### **Influence of Nitrogen Doping on Vacancy-Engineered T-Graphene Fragments: Insights into Electronic and Optical Properties**

Jyotirmoy Deb,<sup>a,\*</sup> and Pratim Kumar Chattaraj<sup>b,\*</sup>

<sup>a</sup> *Materials Science Group, Coal, Energy and Materials Sciences Division, CSIR-North East Institute of Science and Technology, Jorhat 785006, Assam, India*

<sup>b</sup> *Department of Chemistry, Birla Institute of Technology, Mesra, Ranchi 835215, Jharkhand, India*

\*Email: [deb.jyotirmoy11@gmail.com](mailto:deb.jyotirmoy11@gmail.com) (J.D.)

[pratim.chattaraj@gmail.com](mailto:pratim.chattaraj@gmail.com) (P.K.C.)

**Table S1.** Electrostatic component ( $E_{\text{elec}}$ ), steric component ( $E_{\text{ster}}$ ), quantum component ( $E_{\text{quan}}$ ) and total energy ( $E$ ) of TF, vacancy-induced TF and NTFs

| System | $E_{\text{elec}}$ (eV) | $E_{\text{ster}}$ (eV) | $E_{\text{quan}}$ (eV) | $E$ (eV)   |
|--------|------------------------|------------------------|------------------------|------------|
| TF     | -54067.448             | 23507.196              | 1854.016               | -28706.237 |
| v-TF   | -46462.990             | 20243.147              | 1543.261               | -24676.581 |
| v-NTF1 | -49929.450             | 21509.619              | 1937.762               | -26482.069 |
| v-NTF2 | -49919.202             | 21501.360              | 1943.602               | -26474.240 |
| v-NTF3 | -49929.606             | 21513.254              | 1934.558               | -26481.793 |
| v-NTF4 | -53378.404             | 22756.582              | 2347.173               | -28274.649 |
| v-NTF5 | -53389.166             | 22764.046              | 2341.626               | -28283.493 |

**Table S2.** Static and frequency-dependent polarizabilities of vacancy-induced TF and NTFs

| Systems | $\alpha(0;0)$ (au) | $\alpha(\omega;\omega)$ (au) |                      |
|---------|--------------------|------------------------------|----------------------|
|         |                    | $\omega = 0.0428$ au         | $\omega = 0.0856$ au |

|               |         |         |         |
|---------------|---------|---------|---------|
| <b>v-TF</b>   | 355.562 | 389.446 | 391.755 |
| <b>v-NTF1</b> | 338.305 | 353.442 | 422.475 |
| <b>v-NTF2</b> | 388.543 | 413.057 | 409.631 |
| <b>v-NTF3</b> | 318.336 | 331.494 | 396.654 |
| <b>v-NTF4</b> | 315.907 | 326.424 | 369.442 |
| <b>v-NTF5</b> | 270.052 | 275.763 | 296.738 |

**Table S3.** First-order static and frequency-dependent hyperpolarizabilities of vacancy-induced TF and NTFs

| Systems       | $\beta(0;0,0)$<br>(au) | $\beta(-\omega;\omega,0)$ (au) |                      | $\beta(-2\omega;\omega,\omega)$ (au) |                      |
|---------------|------------------------|--------------------------------|----------------------|--------------------------------------|----------------------|
|               |                        | $\omega = 0.0428$ au           | $\omega = 0.0856$ au | $\omega = 0.0428$ au                 | $\omega = 0.0856$ au |
| <b>v-TF</b>   | 0.037                  | 19.254                         | 780.260              | 1.183                                | 7.066                |
| <b>v-NTF1</b> | 0.058                  | 9.356                          | 80.385               | 0.305                                | 58.170               |
| <b>v-NTF2</b> | 1228.048               | 11033.623                      | 1521.465             | 4678.391                             | 782184.422           |
| <b>v-NTF3</b> | 1.374                  | 2.136                          | 55.867               | 2.475                                | 204.944              |
| <b>v-NTF4</b> | 162.629                | 178.125                        | 246.319              | 215.940                              | 16641.588            |
| <b>v-NTF5</b> | 0.049                  | 1.341                          | 9.893                | 0.110                                | 12.837               |

**Table S4.** Second-order static and frequency-dependent hyperpolarizabilities of vacancy-induced TF and NTFs

| Systems       | $\gamma(0;0,0,0)$<br>(au) $\times 10^4$ | $\gamma(-\omega; \omega,0,0) \times 10^4$ (au) |                      | $\gamma(-2\omega; \omega, \omega,0) \times 10^4$ (au) |                      |
|---------------|-----------------------------------------|------------------------------------------------|----------------------|-------------------------------------------------------|----------------------|
|               |                                         | $\omega = 0.0428$ au                           | $\omega = 0.0856$ au | $\omega = 0.0428$ au                                  | $\omega = 0.0856$ au |
| <b>v-TF</b>   | 37.797                                  | 77.953                                         | 2379.332             | -142.067                                              | 896.480              |
| <b>v-NTF1</b> | 21.424                                  | 27.348                                         | 60.582               | 40.814                                                | -299.347             |

|               |        |        |         |        |            |
|---------------|--------|--------|---------|--------|------------|
| <b>v-NTF2</b> | 36.565 | -4.756 | -36.871 | -1.173 | 12066.331  |
| <b>v-NTF3</b> | 20.631 | 26.792 | 50.662  | 36.184 | -71.451    |
| <b>v-NTF4</b> | 18.673 | 21.967 | 43.146  | 31.466 | 3161.48812 |
| <b>v-NTF5</b> | 9.906  | 11.162 | 17.238  | 14.770 | -207.2868  |

---
